# Supplementary material for: Efficacy and Safety of High-Specific-Activity 131I-MIBG Therapy in Patients with Advanced Pheochromocytoma or Paraganglioma
Source: PubMed Central journal article supplement (PMC6495236; doi:10.2967/jnumed.118.217463), 2019-05

Supplemental Table 1: Estimated absorbed radiation doses (mGy/MBq) in 75 patients with unresectable advanced pheochromocytoma or paraganglioma who received a treatment-planning dose of high-specific-activity I-131 meta-iodobenzylguanidine (~5.0 mCi; ~185 MBq).

| Target organ                      | Mean, | Minimum, | Maximum, | Standard deviation |
|-----------------------------------|-------|----------|----------|--------------------|
| Salivary glands                   | 1.499 | 0.486    | 7.957    | 1.134              |
| LLI wall                          | 1.184 | 0.093    | 2.770    | 0.356              |
| Thyroid                           | 0.779 | 0.071    | 11.000   | 1.409              |
| Urinary bladder wall <sup>1</sup> | 0.614 | 0.141    | 0.930    | 0.142              |
| ULI wall                          | 0.514 | 0.091    | 1.120    | 0.138              |
| Liver                             | 0.509 | 0.180    | 7.830    | 0.862              |
| Kidneys                           | 0.360 | 0.085    | 0.772    | 0.163              |
| Spleen                            | 0.343 | 0.091    | 4.470    | 0.495              |
| Lungs                             | 0.323 | 0.123    | 3.170    | 0.344              |
| Heart wall                        | 0.272 | 0.073    | 1.550    | 0.215              |
| Small intestine                   | 0.194 | 0.085    | 0.347    | 0.042              |
| Osteogenic cells                  | 0.151 | 0.085    | 0.369    | 0.044              |
| Gallbladder wall                  | 0.146 | 0.083    | 0.852    | 0.094              |
| Ovaries                           | 0.126 | 0.000    | 0.271    | 0.046              |
| Pancreas                          | 0.117 | 0.068    | 0.484    | 0.054              |
| Adrenals                          | 0.116 | 0.067    | 0.535    | 0.059              |
| Uterus                            | 0.112 | 0.000    | 0.247    | 0.041              |
| Stomach wall                      | 0.100 | 0.059    | 0.279    | 0.033              |
| Thymus                            | 0.083 | 0.049    | 0.212    | 0.027              |
| Muscle                            | 0.082 | 0.049    | 0.188    | 0.024              |
| Red marrow                        | 0.079 | 0.048    | 0.175    | 0.022              |
| Breasts                           | 0.070 | 0.040    | 0.189    | 0.024              |
| Skin                              | 0.063 | 0.036    | 0.153    | 0.018              |
| Testes                            | 0.061 | 0.000    | 0.183    | 0.036              |
| Brain                             | 0.057 | 0.022    | 0.213    | 0.028              |
| Total body                        | 0.107 | 0.064    | 0.414    | 0.045              |

LLI, lower large intestine; ULI, upper large intestine.

<sup>1</sup>The mean bladder voiding interval was 4.8 hours.

Note: Data for 75 patients are provided because one patient underwent treatment planning twice.

Supplemental Figure 1: Scintigraphic images of MIBG-avid tumors.

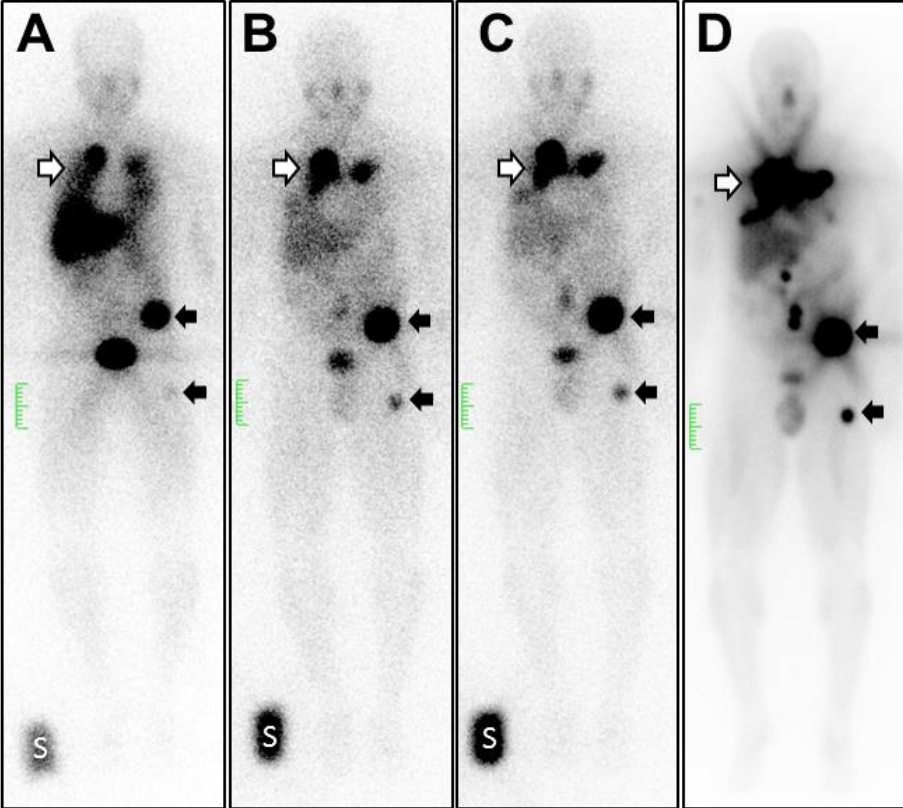

Panel 1:

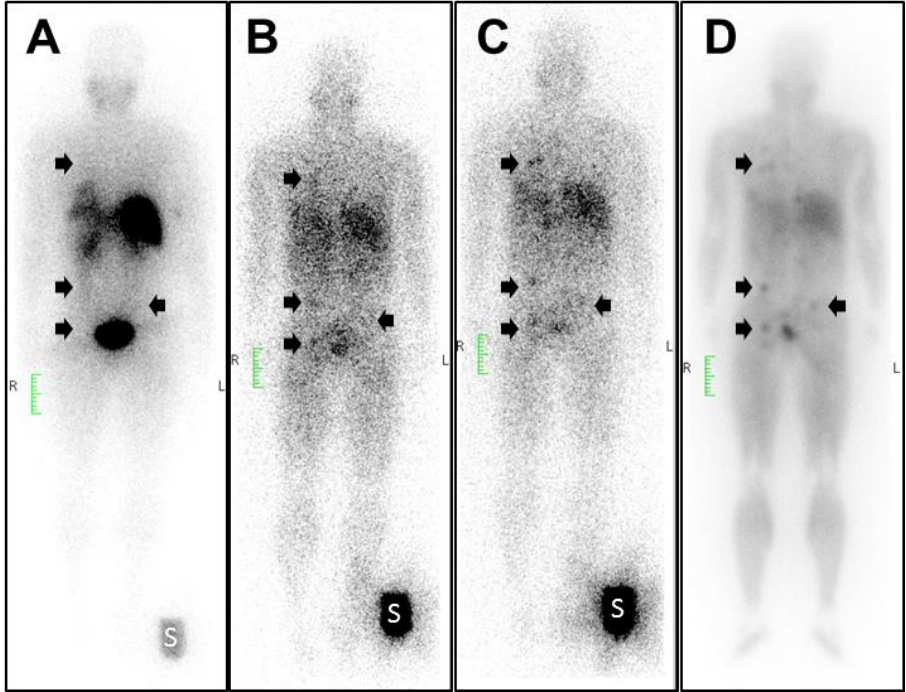

Panel 2:

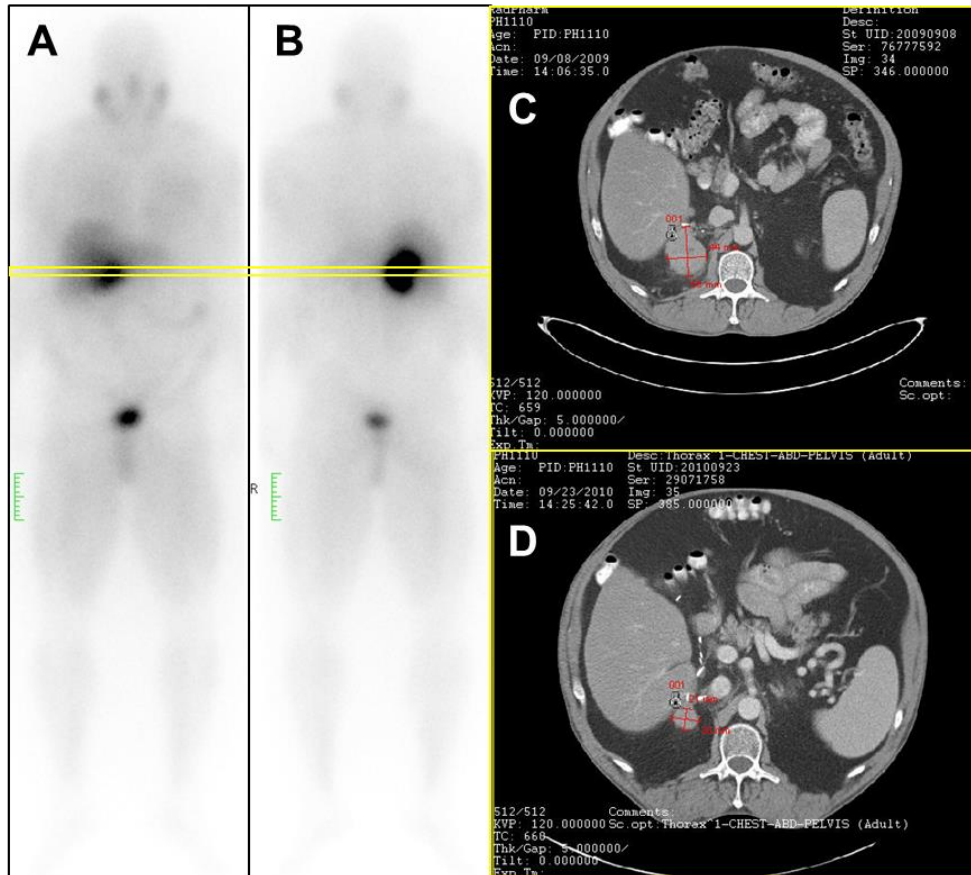

**Panel 3:**

Panel 1: Serial anterior whole body planar images of a 49 year old male with metastatic pheochromocytoma and imaging standard (S) for HSA I-131 MIBG therapy planning showing intense uptake in multiple skeletal (solid arrows) and soft tissue lesions (white arrow) at Day 1 (A), Day 2 (B), Day 3 (C), and a post-therapy anterior whole body planar image at 4 days following a therapeutic administration of 520 mCi (19,240 MBq) HSA I-131 MIBG (D).

Panel 2: Serial posterior whole body planar images of a 44 year old female with metastatic pheochromocytoma and imaging standard (S) for HSA I-131 MIBG therapy planning showing mild uptake in several bone metastases (solid arrows) at Day 1 (A), Day 3 (B), Day 4 (C), and a post-therapy posterior whole body planar image at 3 days following a therapeutic administration of 456 mCi (16,872 MBq) HSA I-131 MIBG (D).

Panel 3: Post-therapy anterior (A) and posterior (B) whole body planar images at 3 days following a therapeutic administration of 506 mCi (18,722 MBq) HSA I-131 MIBG in a 57 year old male with pheochromocytoma demonstrating intense uptake in a retroperitoneal soft tissue lesion. Corresponding slices on CT (yellow lines on the post-therapy scan) at baseline (C) and 12 months post-therapy (D) show that the longest diameter of the lesion decreased 50% from 5.6 cm to 2.8 cm. Patient’s overall RECIST response was categorized as a PR.

Supplemental Figure 2: Duration of >50% reduction in antihypertensive use (full analysis set). The vertical line at 6 months indicates the duration needed to meet the primary endpoint.

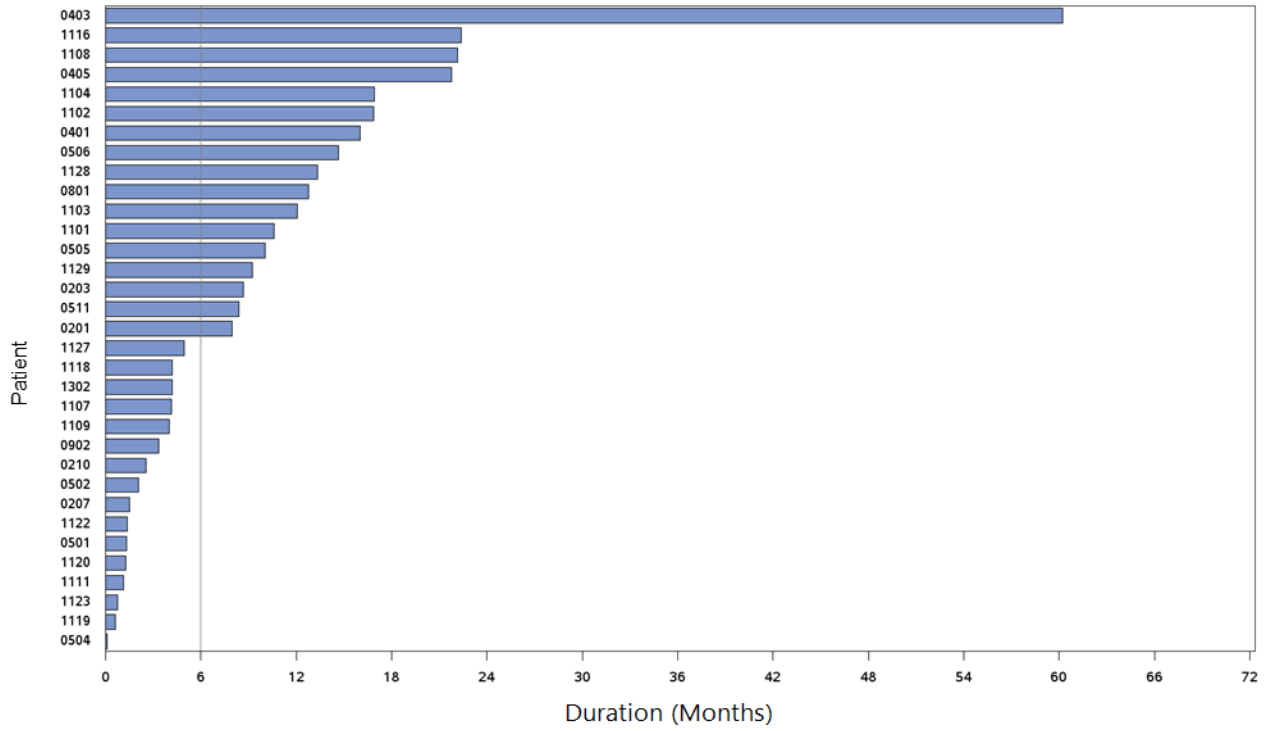

Supplement: jnm217463SupplementalData.pdf [file jnm217463SupplementalData.pdf]
